# Supplementary material
Source: PubMed Central journal article supplement (PMC8084730)
Supplement: mmc1.pdf [file mmc1.pdf]

**ISN-GKHA: Structures, organization, and services for the management of kidney failure in South Asia**

**Supplementary Table, Figure, and Appendix**

**Table S1:** Burden of chronic kidney disease and its risk factors in South Asia.

**Figure S1:** Shortages of kidney failure care providers in South Asia, as per subjective ISN-GKHA survey.

**Supplementary Appendix:** Reference list for annual cost of kidney replacement therapy (for Table 1).

**Table S1: Burden of chronic kidney disease and its risk factors in South Asia.<sup>S1</sup>**

| Country     | CKD prevalence<br>% (95% CI) | Death attributed<br>to CKD<br>% (95% CI) | DALYs attributed<br>to CKD<br>% (95% CI) | Obesity<br>% (95% CI) | High blood pressure<br>% (95% CI) | Smoking<br>% (95% CI) |
|-------------|------------------------------|------------------------------------------|------------------------------------------|-----------------------|-----------------------------------|-----------------------|
| Afghanistan | 5.0<br>(4.6-5.5)             | 1.7<br>(1.5-2.0)                         | 1.0<br>(1.0-1.3)                         | 4.5<br>(2.8-6.7)      | 30.6<br>(23.6-38.3)               | 13.1<br>(10.4-16.2)   |
| Bangladesh  | 7.3<br>(6.7-7.9)             | 1.9<br>(1.7-2.1)                         | 1.3<br>(1.2-1.4)                         | 3.4<br>(2.2-4.7)      | 24.7<br>(19.1-30.6)               | 19.3<br>(16.8-22.0)   |
| Bhutan      | 7.5<br>(6.9-8.1)             | 3.3<br>(2.8-3.7)                         | 2.0<br>(1.6-2.3)                         | 5.8<br>(3.8-8.2)      | 28.1<br>(21.9-34.6)               | 6.6<br>(5.4-8.0)      |
| India       | 8.5<br>(7.9-9.2)             | 2.3<br>(2.1-2.4)                         | 1.5<br>(1.4-1.6)                         | 3.8<br>(2.9-4.9)      | 25.8<br>(21.3-30.7)               | 9.8<br>(9.4-10.3)     |
| Maldives    | 9.3<br>(8.6-10.2)            | 5.9<br>(5.5-6.4)                         | 2.7<br>(2.3-3.1)                         | 7.9<br>(5.5-10.8)     | 24.4<br>(17.9-31.5)               | -                     |
| Nepal       | 7.5<br>(7.0-8.1)             | 2.7<br>(2.3-3.0)                         | 1.7<br>(1.4-2.0)                         | 3.8<br>(2.6-5.2)      | 29.4<br>(23.6-35.7)               | 16.7<br>(13.8-19.9)   |
| Pakistan    | 7.1<br>(6.6-7.7)             | 2.6<br>(2.2-3.0)                         | 1.7<br>(1.4-1.9)                         | 7.8<br>(5.7-10.3)     | 30.5<br>(24.4-37.4)               | 10.5<br>(8.9-12.2)    |
| Sri Lanka   | 13.2<br>(12.3-14.3)          | 3.6<br>(3.3-3.9)                         | 2.4<br>(2.1-2.7)                         | 5.4<br>(3.7-7.7)      | 22.4<br>(16.5-29.3)               | 10.0<br>(8.7-11.4)    |

Abbreviations: CKD: chronic kidney disease; DALYs: disability-adjusted life years; CI: confidence interval

“-“: Data not reported/unavailable

**Figure S1:** Shortages of kidney failure care providers in South Asia, as per subjective ISN-GKHA survey.

| Country        | Nephrologists | Transplant surgeons | Surgeons (HD access) | Surgeons (PD access) | Interventional radiologists (HD access) | Interventional radiologists (PD access) | Laboratory technicians | Dietitians | Radiologists (ultrasound) | Vascular access coordinators | Counsellors / psychologists | Transplant coordinators | Dialysis nurses | Dialysis technicians | Total shortage |
|----------------|---------------|---------------------|----------------------|----------------------|-----------------------------------------|-----------------------------------------|------------------------|------------|---------------------------|------------------------------|-----------------------------|-------------------------|-----------------|----------------------|----------------|
| Total shortage | 7             | 7                   | 7                    | 6                    | 7                                       | 7                                       | 6                      | 6          | 6                         | 7                            | 7                           | 7                       | 6               | 6                    |                |
| Afghanistan    |               |                     |                      |                      |                                         |                                         |                        |            |                           |                              |                             |                         |                 |                      | 14             |
| Bangladesh     |               |                     |                      |                      |                                         |                                         |                        |            |                           |                              |                             |                         |                 |                      | 14             |
| Bhutan         |               |                     |                      |                      |                                         |                                         |                        |            |                           |                              |                             |                         |                 |                      | 8              |
| India          |               |                     |                      |                      |                                         |                                         |                        |            |                           |                              |                             |                         |                 |                      | 14             |
| Nepal          |               |                     |                      |                      |                                         |                                         |                        |            |                           |                              |                             |                         |                 |                      | 14             |
| Pakistan       |               |                     |                      |                      |                                         |                                         |                        |            |                           |                              |                             |                         |                 |                      | 14             |
| Sri Lanka      |               |                     |                      |                      |                                         |                                         |                        |            |                           |                              |                             |                         |                 |                      | 14             |

Abbreviations: ISN: International Society of Nephrology; GKHA: Global Kidney Health Atlas; HD: hemodialysis; PD: peritoneal dialysis

|             |
|-------------|
| No shortage |
| Shortage    |

### Supplementary Reference:

- S1. Institute for Health Metrics and Evaluation. Global Burden of Disease Study 2017 (GBD 2017) Data Resources. Available at: <http://ghdx.healthdata.org/gbd-2017>. Accessed August 6, 2020.

### Supplementary Appendix: Reference list for annual cost of kidney replacement therapy (for Table 1) (APA format).

- Abraham, G., Pratap, B., Sankarasubbaiyan, S., Govindan, P., Nayak, K. S., Sheriff, R., & Naqvi, S. J. (2008). Chronic peritoneal dialysis in South Asia—challenges and future. *Peritoneal dialysis international*, 28(1), 13-19.
- Ali Jaffar Naqvi, S. (2000). Nephrology services in Pakistan. *Nephrology Dialysis Transplantation*, 15(6), 769-771.
- Hirachan, P., Kharel, T., Shah, D. S., & Ball, J. (2010). Renal replacement therapy in Nepal. *Hemodialysis International*, 14(4), 383-386.
- Jeloka, T. K., Upase, S., & Chitikeshi, S. (2012). Monthly cost of three exchanges a day peritoneal dialysis is same as of thrice a week hemodialysis in self-paying Indian patients. *Indian journal of nephrology*, 22(1), 39.
- Jindal, R. M., Falta, E. M., Baines, L., & Elster, E. A. (2011). Health policy for renal replacement therapy in developing countries. *Journal of Healthcare, Science & The Humanities*, 1(1), 41-54.
- Khanna, U. (2009). The economics of dialysis in India. *Indian journal of nephrology*, 19(1), 1.
- Li, P. K., & Chow, K. M. (2001). The cost barrier to peritoneal dialysis in the developing world—an Asian perspective. *Peritoneal Dialysis International*, 21(3\_suppl), 307-313.
- Ranasinghe, P., Perera, Y. S., Makarim, M. F., Wijesinghe, A., & Wanigasuriya, K. (2011). The costs in provision of haemodialysis in a developing country: a multi-centered study. *BMC nephrology*, 12(1), 42.
- Shaikh, M., Woodward, M., John, O., Bassi, A., Jan, S., Sahay, M., ... & Jha, V. (2018). Utilization, costs, and outcomes for patients receiving publicly funded hemodialysis in India. *Kidney International*, 94(3), 440-445.

Suja, A., Anju, R., Anju, V., Neethu, J., Peeyush, P., & Saraswathy, R. (2012). Economic evaluation of end stage renal disease patients undergoing hemodialysis. *Journal of pharmacy & bioallied sciences*, 4(2), 107.

van der Tol, A., Lameire, N., Morton, R. L., Van Biesen, W., & Vanholder, R. (2019). An international analysis of dialysis services reimbursement. *Clinical Journal of the American Society of Nephrology*, 14(1), 84-93.
